# Supplementary material
Source: PubMed Central journal article supplement (PMC3166453)
Supplement: embor2011126s2.pdf [file embor2011126s2.pdf]

Manuscript EMBOR-2010-34618

## **GTP-binding to DAP-kinase's ROC domain regulates its function via novel intramolecular signaling**

Rodrigo Carlessi, Vered Levin-Salomon, Sara Ciprut, Shani Bialik, Hanna Berissi, Shira Albeck, Yoav Peleg, Adi Kimchi

*Corresponding author: Adi Kimchi, Weizmann Inst. of Science*

---

**Review timeline:**

Submission date:

05 December 2010

Accepted:

27 May 2011

---

**No Peer Review Process File is available with this article, as the authors have chosen not to make the review process public in this case.**
